# Supplementary material for: A P-doped PtNi alloy supported on N,C-doped TiO2 nanosheets as a stable electrocatalyst for the oxygen reduction reaction in an acidic electrolyte
Source: Royal Society of Chemistry journal article supplement (doi:10.1039/d3cc00859b), 2023-01-01
Supplement: d3cc00859b1.pdf [file d3cc00859b1.pdf]

***Supporting Information***  
***for***  
**P-doped PtNi alloy supported on N,C-doped TiO<sub>2</sub> nanosheets as  
stable electrocatalyst for oxygen reduction reaction in acidic  
electrolyte**

*Chen Lu, Chao Xu, Peng-Peng Guo, Kun-Zu Yang, Ying Xu, Hua-Min Chi, Ping-Jie Wei and Jin-Gang Liu\**

Key Lab for Advanced Materials, School of Chemistry & Molecular Engineering, East China University of Science and Technology, Shanghai, 200237, P. R. China. E-mail: liujingang@ecust.edu.cn

## **Materials and synthesis**

### **Synthesis of N, C-doped TiO<sub>2</sub> nanosheets**

The TiO<sub>2</sub> nanosheets were prepared using a hydrothermal method according to previous report.<sup>[1]</sup> Afterward, a mixture of the prepared TiO<sub>2</sub> nanosheets and urea with mass ratio of 1:5 was calcinated at 450 °C in high purity N<sub>2</sub> for 2 h, and naturally cooling to RT produced the N, C-doped TiO<sub>2</sub> nanosheets.

### **Synthesis of PtNi@N,C-TiO<sub>2</sub> nanosheets**

The obtained N,C-doped TiO<sub>2</sub> nanosheets (50 mg) were added into ethylene glycol (EG, 70 mL), and the resultant solution was ultrasonicated and stirred to form uniform slurry. Afterward, the Pt precursor H<sub>2</sub>PtCl<sub>6</sub>·6H<sub>2</sub>O (84 mg) and the Ni precursor NiCl<sub>2</sub>·6H<sub>2</sub>O (40 mg) were added into the above uniform slurry, of which pH was adjusted to about 9-10 using 3.0 M NaOH solution. The slurry solution was stirred under heat at 150 °C in an oil bath for 5 h. After cooling to RT, the obtained slurry was separated by high-speed centrifugation, washed with distilled water and ethanol several times, and finally dried at 60 °C for 12 h to provide the PtNi@N,C-TiO<sub>2</sub> nanosheets.

### **Synthesis of P-doped PtNi on N,C-doped TiO<sub>2</sub> nanosheets (P-PtNi@N,C-TiO<sub>2</sub>)**

The obtained PtNi@N,C-TiO<sub>2</sub> nanosheets and NaH<sub>2</sub>PO<sub>2</sub> with a mass ratio of 1:4 was separately

placed on a porcelain boat, which to be put in a tube furnace and was heated to 350 °C with rate of 5 °C min<sup>-1</sup> under N<sub>2</sub> atmosphere and held on for 2 h, then naturally cooled to RT to produce the P-doped product P-PtNi@N,C-TiO<sub>2</sub> nanosheets.

### **Synthesis of P-doped PtNi on carbon black (P-PtNi@C)**

The preparation process of P-doped PtNi@C was similar to that of P-PtNi@N,C-TiO<sub>2</sub> nanosheets, except that N,C-TiO<sub>2</sub> nanosheets were replaced by carbon black.

### **Materials Characterization**

The morphology and structure of the prepared nanomaterials were investigated by transmission electron microscopy (TEM; JEM-1400) and high-angle annular dark-field scanning transmission electron microscopy (HAADF-STEM; Talos F200X). X-ray diffraction (XRD) spectra were recorded using the D/max2550VB/PC18KW, where the range of 2θ was 10-80°. XPS profiles were recorded on a Thermo Escalab 250 instrument with a monochromatic Al Kα X-ray source (hν =1486.6 eV). All binding energies were referenced to the C1s peak (284.6 eV) corresponding to adventitious carbon. Quantitative analysis of elements was performed using inductively coupled plasma-optical emission spectrometer (ICP-OES).

### **Electrochemical Measurements**

Electrochemical performance of all catalysts was evaluated using a rotating ring-disk electrode (RRDE) on CHI 760D electrochemical work station via traditional three-electrode system. During the RRDE tests, the glassy carbon electrode was used as work electrode (diameter: 5 mm; geometric area: 0.196 cm<sup>2</sup>), carbon rod as the counter electrode and Ag/AgCl as the reference electrode, respectively.

**Catalyst ink preparation:** The prepared catalyst (5.0 mg) was added to a glass vial with 25 μL of a 5 wt% Nafion (Aldrich) solution and 225 μL of isopropanol, which was subjected to sonication in a sonicator bath for 1 h to afford a homogeneous suspension. The loading amount of Pt with samples of P-PtNi@N,C-TiO<sub>2</sub>, PtNi@N,C-TiO<sub>2</sub> and 20 wt% Pt/C (Vulcan XC-72, JM HiSPEC 3000) was 22, 18, and 100 μg cm<sup>-2</sup>, respectively. Cyclic voltammetry (CV) and Linear sweep voltammetry (LSV) were conducted in an Ar or O<sub>2</sub>-saturated 0.1 M HClO<sub>4</sub> solution at a scanning rate of 10 mV s<sup>-1</sup> at room temperature. All potentials in this study were relative to the reversible hydrogen electrode (RHE).

The potential with respect to RHE can be calculated as follows:

$$E_{(RHE)} = E_{(Ag/AgCl)} + 0.059 \times pH + E^{\theta}_{(Ag/AgCl)}.$$

The Koutecky-Levich (K-L) equation was used to calculate the kinetic current density ( $j_K$ ) of the catalysts at 0.9 V (vs. RHE) for the ORR kinetic process, which in turn led to the calculation of mass activity (MA) and specific activity (SA) [2].

$$\frac{1}{j} = \frac{1}{j_L} + \frac{1}{j_K}$$

where  $j$  was the measured current density and  $j_L$  was the limiting diffusion current density.

$$MA = \frac{j_K}{m_{Pt}}$$

Where  $m_{Pt}$  was the Pt loading of the catalysts used in the working electrode.

$$SA = \frac{MA}{ECSA}$$

Where  $ECSA$  was the electrochemical surface area of the catalyst, which could be estimated by  $H_{upd}$  method.

In addition, the ECSA was evaluated through hydrogen underpotential deposition ( $H_{upd}$ ) (assumption factor = 210  $\mu C\ cm^{-2}$ ), which was performed in  $O_2$ -saturated 0.1 M  $HClO_4$  with a sweep rate of 50 mV/s.[3] The ECSA was obtained via the  $H_{upd}$  method by the following equation.

$$ECSA = \frac{S_H/V}{0.21(mC\ cm^{-2}) * M_{Pt}}$$

$S_H$  was the active specific surface area calculated from H adsorption/desorption,  $V$  represented the scan rate and  $M_{Pt}$  indicated the mass of Pt.

The 4-electron reduction selectivity of the catalysts for ORR was evaluated using a RRDE. The ORR electron transfer number ( $n$ ) and hydrogen peroxide yield ( $H_2O_2$  %) were calculated by the following equation, respectively.

$$n = 4 * \frac{i_d * N}{N * i_d + i_r}$$

$$H_2O_2\ \% = 200 * \frac{i_r/N}{i_d + i_r/N}$$

where  $i_r$  is the ring current,  $i_d$  is the disk current, and  $N$  stands for the calibrated collective efficiency of the RRDE ( $N = 0.26$ ).

Finally, the stability of the catalysts was assessed via an accelerated durability test (ADT) for 10000 cycles with a sweep rate of 50 mV/s within potential range of 0.6-1.0 V vs. RHE.

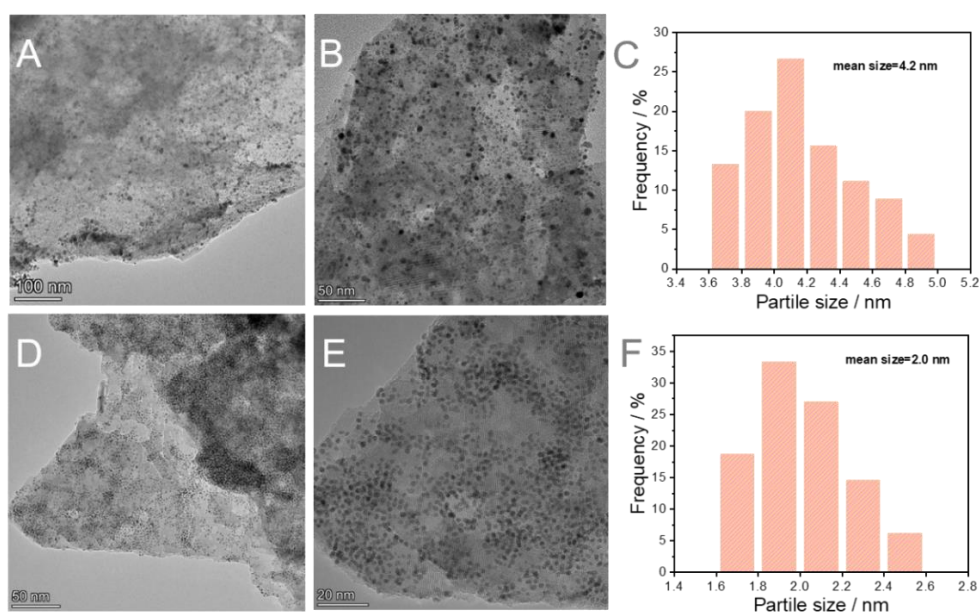

Fig. S1 TEM images and particle size distribution of P-PtNi@N,C-TiO<sub>2</sub> NPs (A-C) and PtNi@N,C-TiO<sub>2</sub> NPs (D-F).

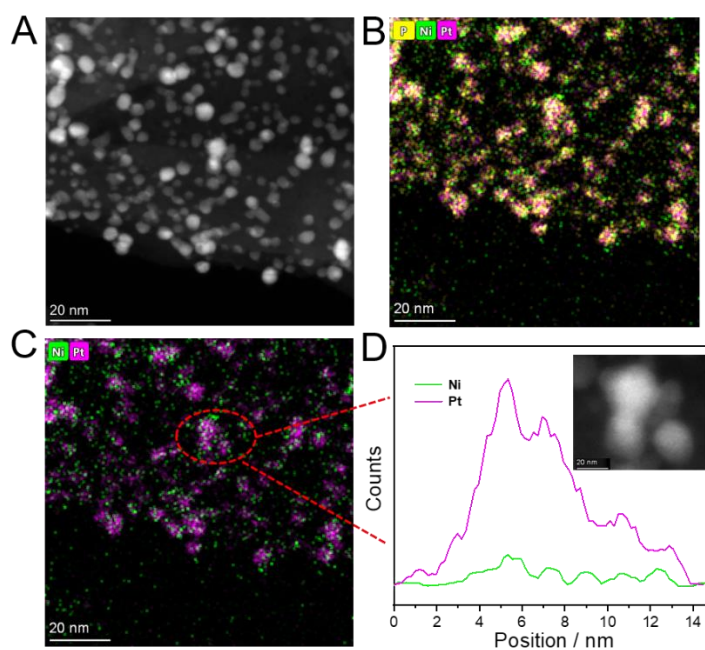

Fig. S2 (A) HAADF-STEM image of P-PtNi@N,C-TiO<sub>2</sub> NPs, (B,C) elemental mapping mixed distribution of P-PtNi@N,C-TiO<sub>2</sub> NPs, (D) EDS line-scanning profile of Pt, Ni elements across P-PtNi@N,C-TiO<sub>2</sub> NPs (scale bars:20 nm).

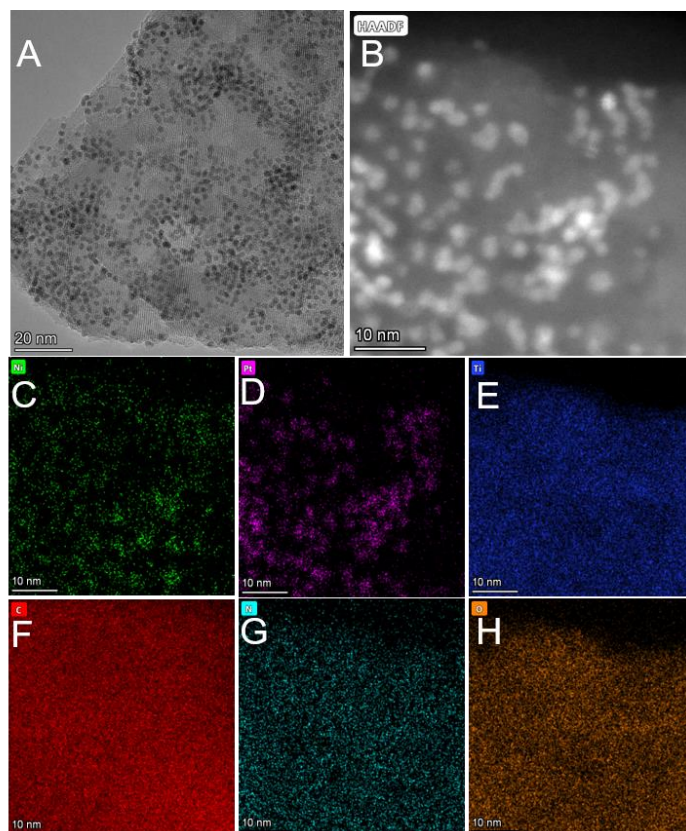

Fig. S3 (A)TEM image (scale bars:20 nm), (B) HAADF-STEM image and (C-H) elemental mapping distribution of PtNi@N,C-TiO<sub>2</sub> NPs (scale bars:10 nm).

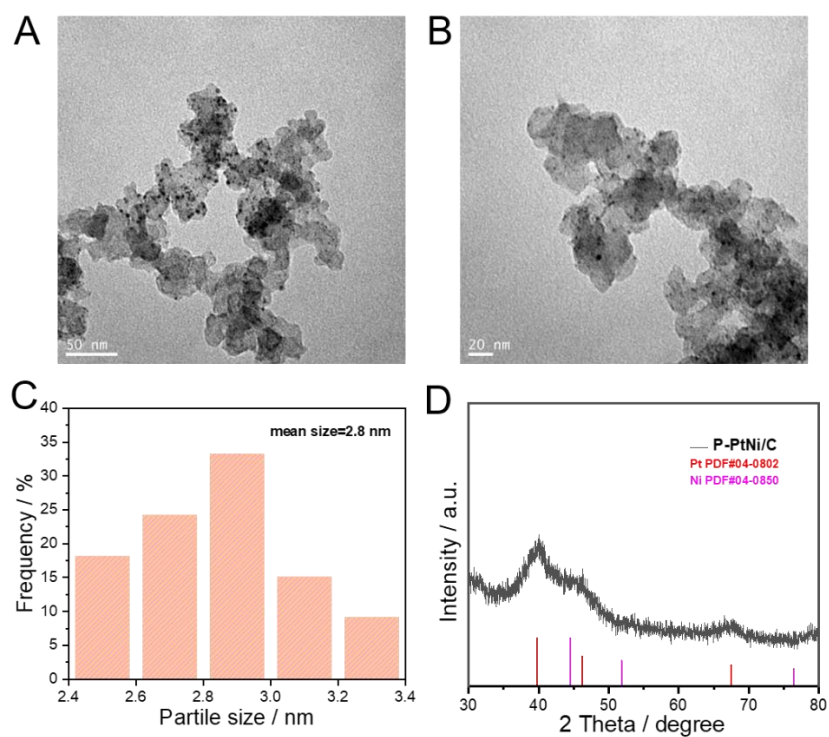

Fig. S4 TEM images (A, B), particle size distribution (C), and XRD pattern of P-PtNi@C (D).

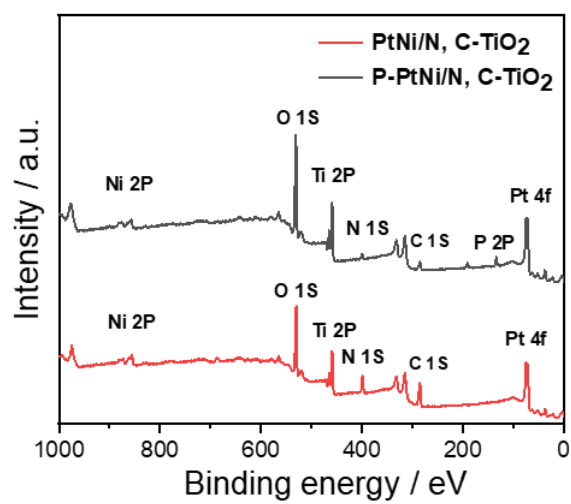

Fig. S5 XPS spectra of P-PtNi@N,C-TiO<sub>2</sub> NPs and PtNi@N,C-TiO<sub>2</sub> NPs.

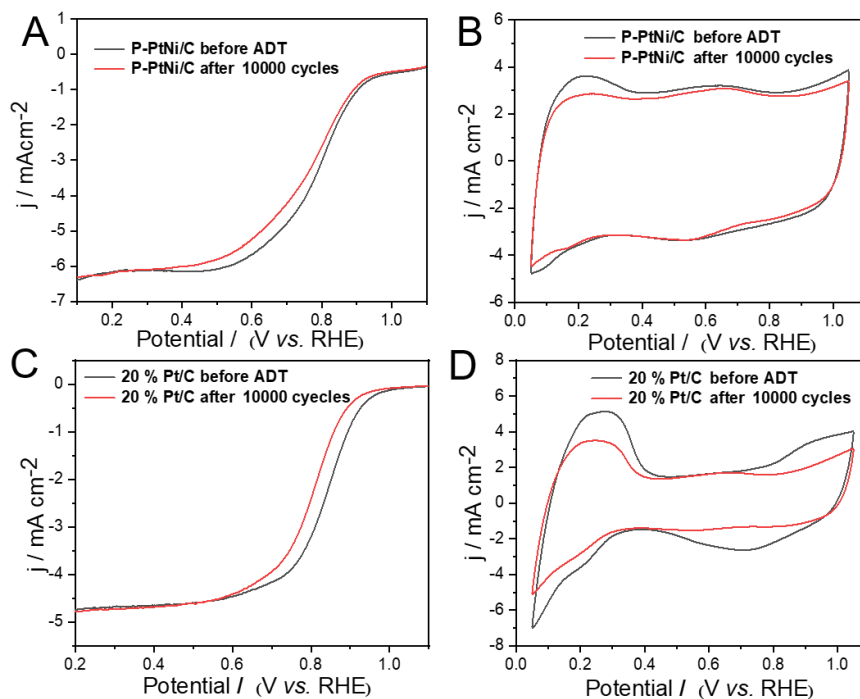

Fig. S6 LSV curves of P-PtNi@C (A) and 20% Pt/C (C) before and after 10 000 potential cycles in potential range of 0.6-1.0 V at 1600 rpm in O<sub>2</sub>-saturated 0.1 M HClO<sub>4</sub> solution. CV curves of P-PtNi@C (B) and 20% Pt/C (D) before and after ADT in Ar-saturated 0.1 M HClO<sub>4</sub> solution.

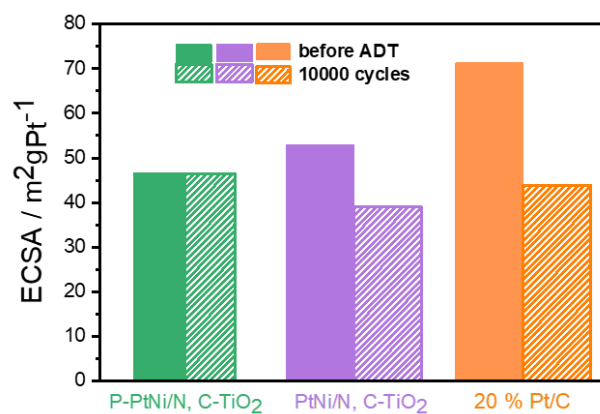

Fig. S7 ECSA of P-PtNi@N,C-TiO<sub>2</sub>, PtNi@N,C-TiO<sub>2</sub> and 20% Pt/C before and after ADT in 0.1 M HClO<sub>4</sub> solution.

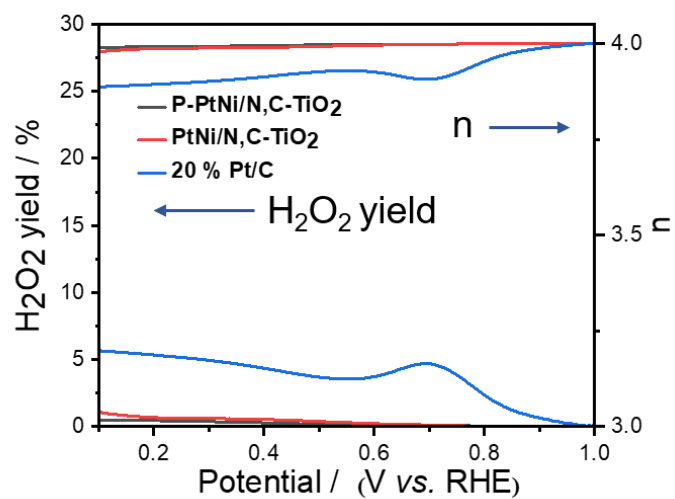

Fig. S8 Electron transfer number ( $n$ ) and H<sub>2</sub>O<sub>2</sub> yield of P-PtNi@N,C-TiO<sub>2</sub>, PtNi@N,C-TiO<sub>2</sub> and 20% Pt/C for ORR in 0.1 M HClO<sub>4</sub>.



**Table S1** Elemental contents of P-PtNi@N,C-TiO<sub>2</sub> NPs and PtNi@N,C-TiO<sub>2</sub> NPs measured by XPS.

| Catalyst                    | C     | N     | O     | Ti    | Pt   | Ni    | P    |
|-----------------------------|-------|-------|-------|-------|------|-------|------|
|                             | at %  | at %  | at %  | at %  | at % | at %  | at % |
| P-PtNi@N,C-TiO <sub>2</sub> | 5.41  | 9.37  | 49.79 | 12.49 | 6.57 | 13.52 | 2.85 |
| PtNi@N,C-TiO <sub>2</sub>   | 35.35 | 14.97 | 31.72 | 9.27  | 5.77 | 2.92  | 0    |

**Table S2** Pt, Ni and P element content in P-PtNi@N,C-TiO<sub>2</sub> NPs, PtNi@N,C-TiO<sub>2</sub> NPs and P-PtNi@C NPs measured by ICP-OES.

| Catalyst                    | Pt<br>wt % | Ni<br>wt % | Pt:Ni<br>molar ratio | P<br>wt % |
|-----------------------------|------------|------------|----------------------|-----------|
| P-PtNi@N,C-TiO <sub>2</sub> | 9.7        | 2.64       | 1.11                 | 3.57      |
| PtNi@N,C-TiO <sub>2</sub>   | 8.28       | 2.46       | 1.02                 | 0         |
| P-PtNi@C                    | 6.25       | 1.84       | 1.03                 | 1.75      |

**Table S3** Comparison of catalytic performance with previously reported catalysts

| Catalyst                                                   | The loading of Pt (ug cm <sup>-2</sup> ) | Mass activity (A mg <sub>Pt</sub> <sup>-1</sup> ) @0.9V (vs. RHE) | Specific activity (mA cm <sup>-2</sup> ) @0.9V (vs RHE) | Mass Activity loss, cycles (0.6-1.0V vs RHE) | Reference |
|------------------------------------------------------------|------------------------------------------|-------------------------------------------------------------------|---------------------------------------------------------|----------------------------------------------|-----------|
| P-PtNi@N,C-TiO <sub>2</sub>                                | 22                                       | 0.53                                                              | 1.13                                                    | 10000 cycles 11.3%                           | This work |
| 20 % Pt/C                                                  | 100                                      | 0.13                                                              | 0.18                                                    | 10000 cycles 39 %                            | This work |
| Pt-TiO <sub>2-x</sub> NS                                   | 16.8                                     | 0.314                                                             | 0.314                                                   | 10000 cycles 32 %                            | 4         |
| Pt/Ti <sub>0.8</sub> Co <sub>0.2</sub> O <sub>2</sub> NTAs | 25                                       | 0.53                                                              | 0.96                                                    | 10000 cycles 8 %                             | 5         |
| WO <sub>x</sub> -PtNi NWs                                  | /                                        | 0.85                                                              | 1.29                                                    | 30000 cycles 23.89 %                         | 6         |
| Pt <sub>3</sub> Cu/TiN                                     | 10.2                                     | 2.43                                                              | 5.32                                                    | 10000 cycles 16.1 %                          | 7         |
| Pt/TPY/TNTS-Mo                                             | 10                                       | 0.12                                                              | 1.2                                                     | 10000 cycles 4.2 %                           | 8         |
| Pt/TiO <sub>2</sub> -C                                     | 20.4                                     | 0.205                                                             | 0.256                                                   | 10000 cycles 0.9 %                           | 9         |
| PtCo/TiO <sub>2</sub> /CNT                                 | 80                                       | 0.46                                                              | 0.606                                                   | 30000 cycles 11.24 %                         | 10        |

## References

1. J. Wan, W. Chen, C. Jia, L. Zheng, J. Dong, X. Zheng, Y. Wang, W. Yan, C. Chen, Q. Peng, D. Wang and Y. Li, *Adv. Mater.*, 2018, **30**, 1705369.
2. J. Guan, S. Yang, T. Liu, Y. Yu, J. Niu, Z. Zhang and F. Wang, *Angew. Chem. Int. Ed.*, 2021, **60**, 21899-21904.
3. S. He, Y. Liu, H. Zhan and L. Guan, *ACS Catal.*, 2021, **11**, 9355-9365.
4. K. M. Naik, E. Higuchi and H. Inoue, *J. Power Sources*, 2020, **455**, 227972.
5. F. Yu, Y. Xie, L. Wang, N. Yang, X. Meng, X. Wang, X. L. Tian and X. Yang, *Electrochim. Acta*, 2018, **265**, 364-371.
6. Y. Mo, S. Feng, T. Yu, J. Chen, G. Qian, L. Luo and S. Yin, *J. Colloid Interface Sci.*, 2022, **607**, 1928-1935.
7. Z. Wu, D. Dang and X. Tian, *ACS Appl. Mater. Interfaces*, 2019, **11**, 9117-9124.
8. R. Alipour Moghadam Esfahani, H. M. Fruehwald, N. O. Laschuk, M. T. Sullivan, J. G. Egan, I. I. Ebraliidze, O. V. Zenkina and E. B. Easton, *Appl. Catal., B*, 2020, **263**, 118272.
9. J. Wang, M. Xu, J. Zhao, H. Fang, Q. Huang, W. Xiao, T. Li and D. Wang, *Appl. Catal., B*, 2018, **237**, 228-236.
10. F. Cao, H. Zhang, X. Duan, X. Li, R. Ding, K. Hua, Z. Rui, Y. Wu, M. Yuan, J. Wang, J. Li, M. Han and J. Liu, *ACS Appl. Mater. Interfaces*, 2022, **14**, 51975-51982.
